# Supplementary material for: Unraveling the mechanism for an amelogenin-derived peptide regulated hydroxyapatite mineralization via specific functional domain identification
Source: Royal Society of Chemistry journal article supplement (doi:10.1039/d0tb00949k), 2020-01-01
Supplement: d0tb00949k1.pdf [file d0tb00949k1.pdf]

## Unraveling mechanism for an amelogenin-derived peptide regulated hydroxyapatite mineralization via specific functional domain identification

Yufei Wang<sup>a, b, 1</sup>, Die Hu<sup>a, b, 1</sup>, Jingyao Cui<sup>a</sup>, Yuhao Zeng<sup>a, b</sup>, Xinyan Gan<sup>a</sup>, Zhongxin Chen<sup>a</sup>, Qian Ren<sup>a, b</sup> and Linglin Zhang<sup>a, b, \*</sup>

<sup>a</sup> State Key Laboratory of Oral Diseases & National Clinical Research Centre for Oral Disease, Sichuan University, Chengdu, China

<sup>b</sup> Dept. of Cariology and Endodontics West China Hospital of Stomatology, Sichuan University, Chengdu, China

<sup>1</sup> These two authors contributed equally to this work.

\* Corresponding Author: Linglin Zhang, Professor, Postal Address: No.14, Section 3 of Renmin Road South, Chengdu, China. Telephone: 0086-

028-85503470; E-mail: [zhll\\_sc@163.com](mailto:zhll_sc@163.com)

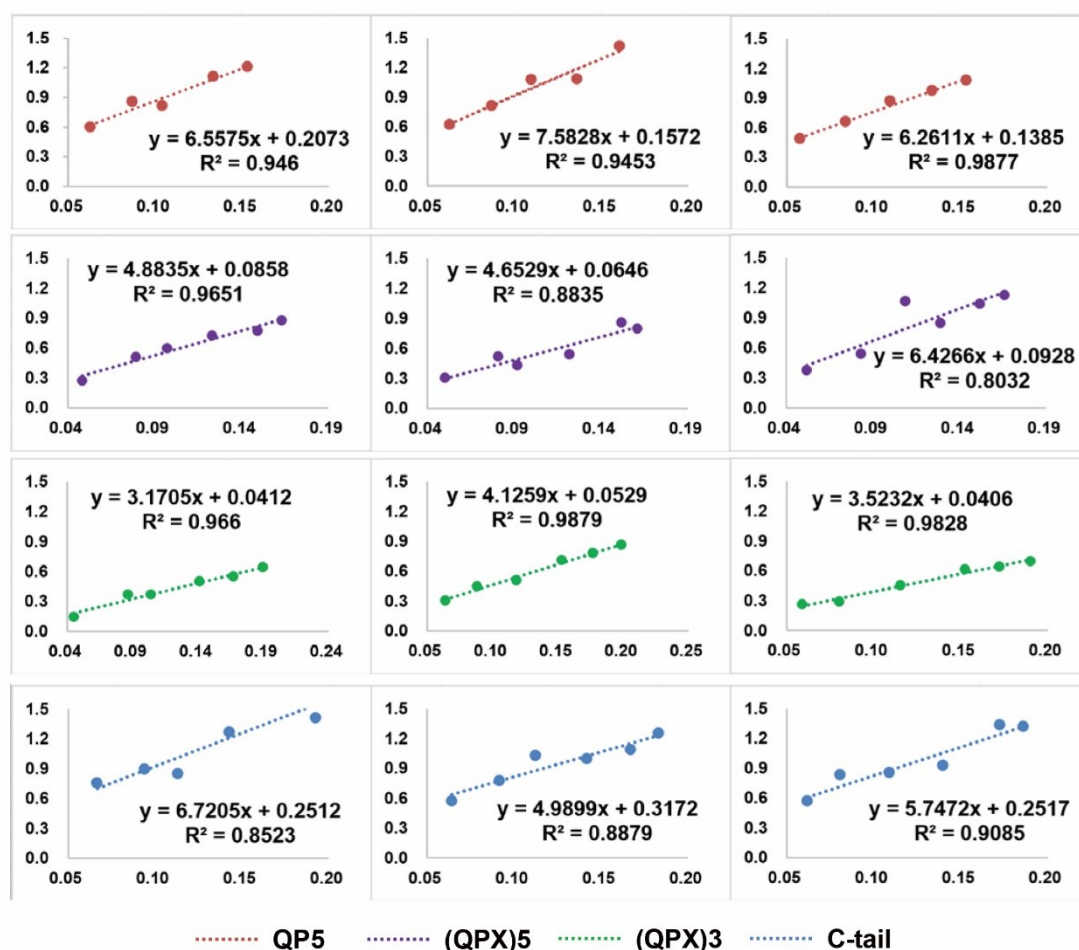

Suppl Figure 1 Langmuir adsorption isotherms of QP5, (QPX)5, (QPX)3 and C-tail (three independent experiment).

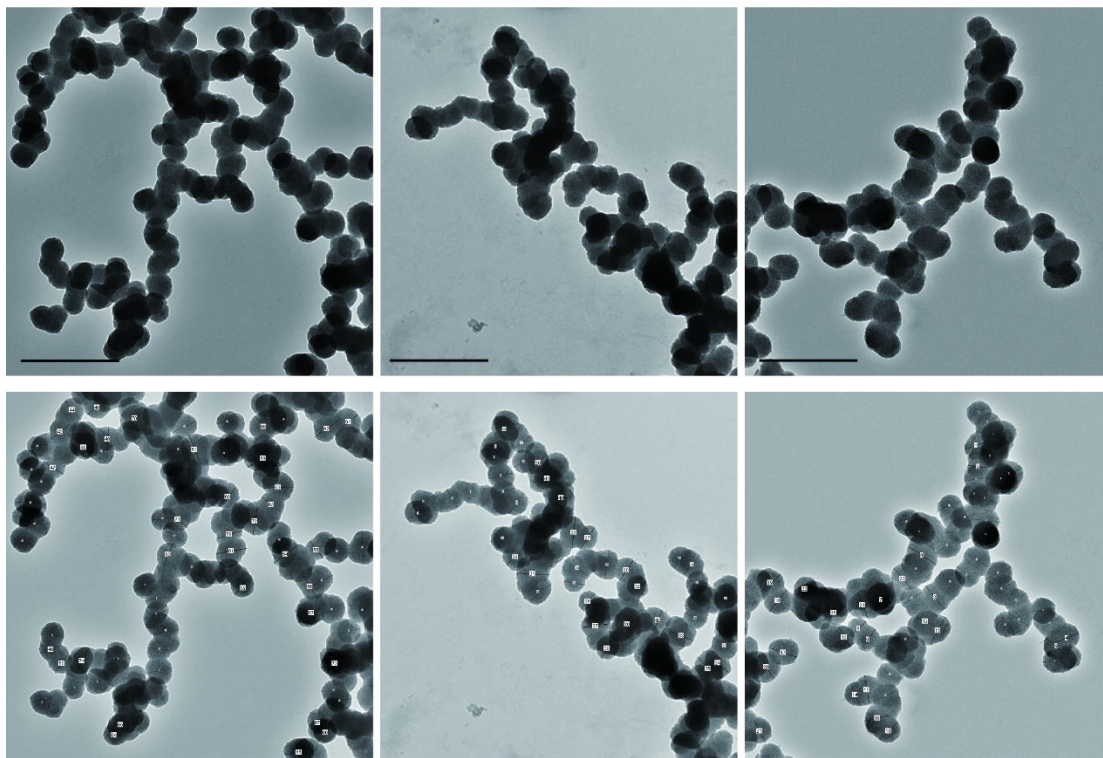

**Suppl Figure 2** The measure of primary particles for ACPs for control group and the determination of diameters. (min: 99.87; max: 183.66; mean±SD: 132.52±14.95; N: 174 )

---

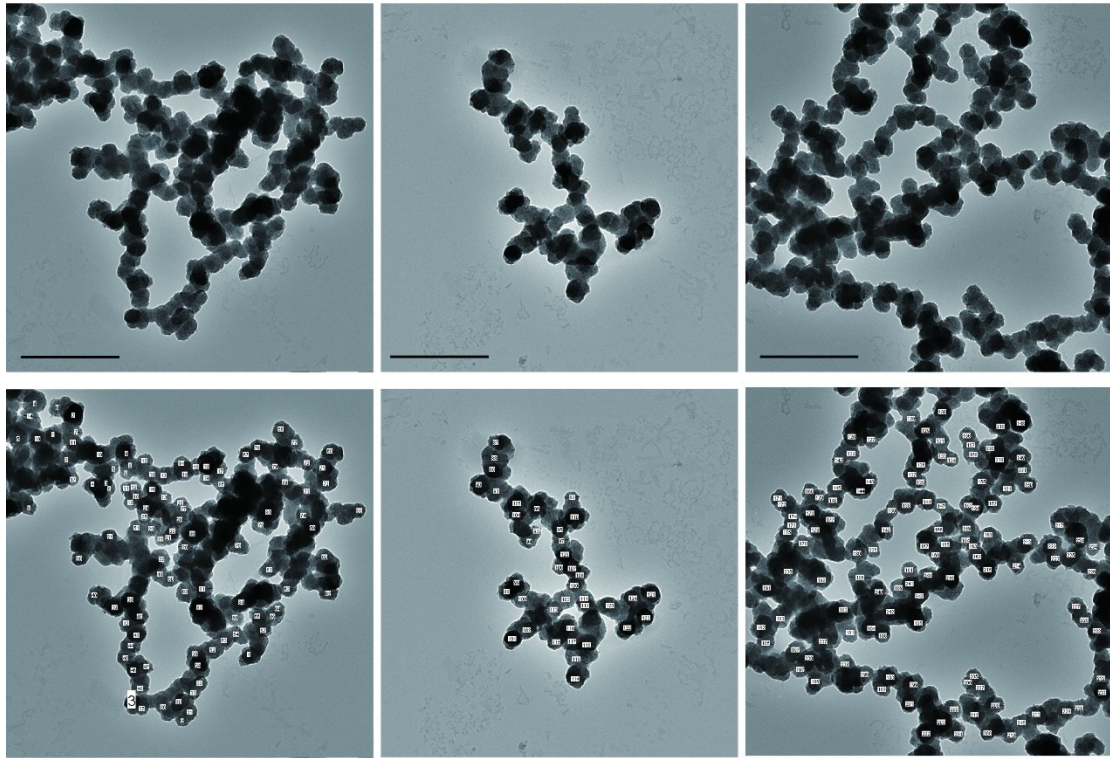

**Suppl Figure 3** The measure of primary particles for ACPs for QP5 group and the determination of diameters. (min: 56.9; max: 109.87; mean±SD: 83.23±11.13; N: 260 )

---

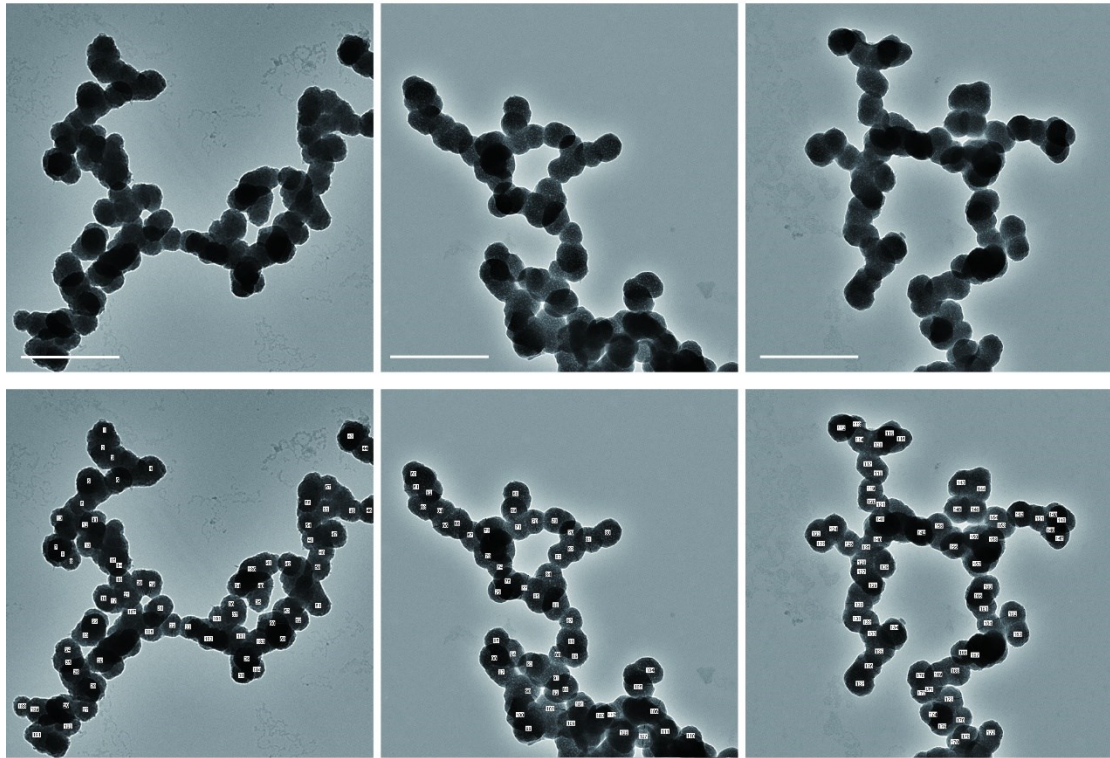

**Suppl Figure 4** The measure of primary particles for ACPs for (QPX)5 group and the determination of diameters. (min: 83.64; max: 162.67; mean±SD: 123.07±15.57; N: 191)

---



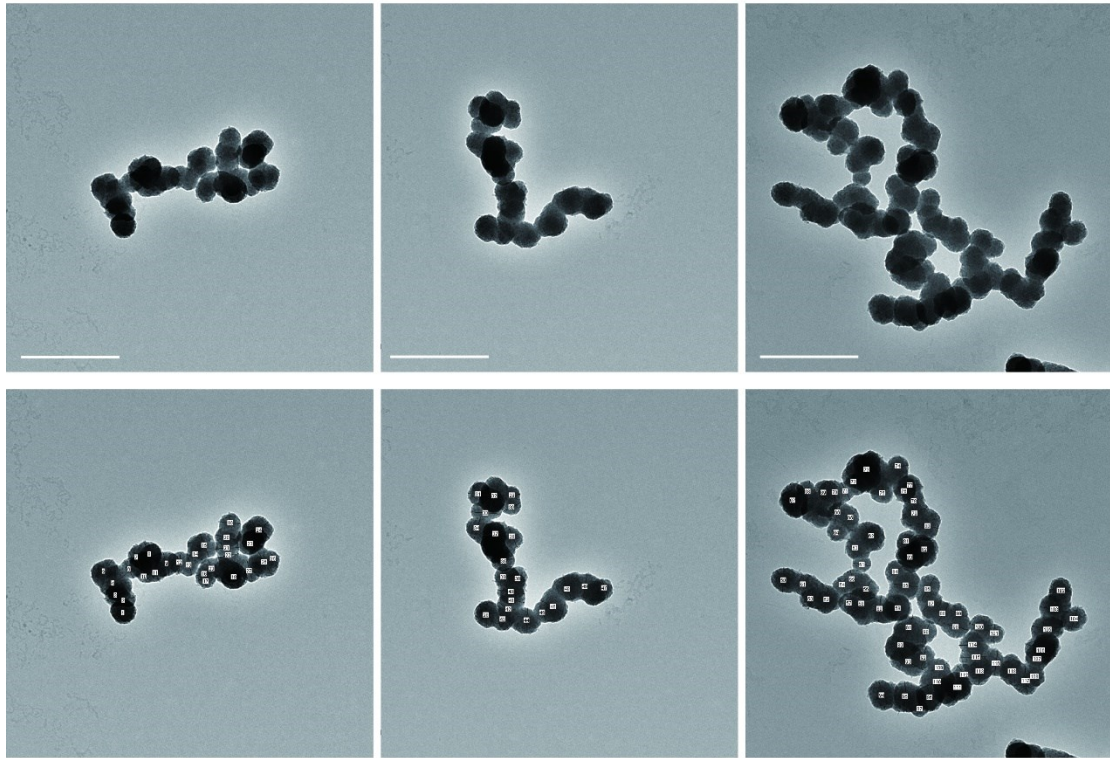

**Suppl Figure 5** The measure of primary particles for ACPs for (QPX)3 group and the determination of diameters. (min: 62.89; max: 164.41; mean±SD: 125.32±17.03; N: 118)

---

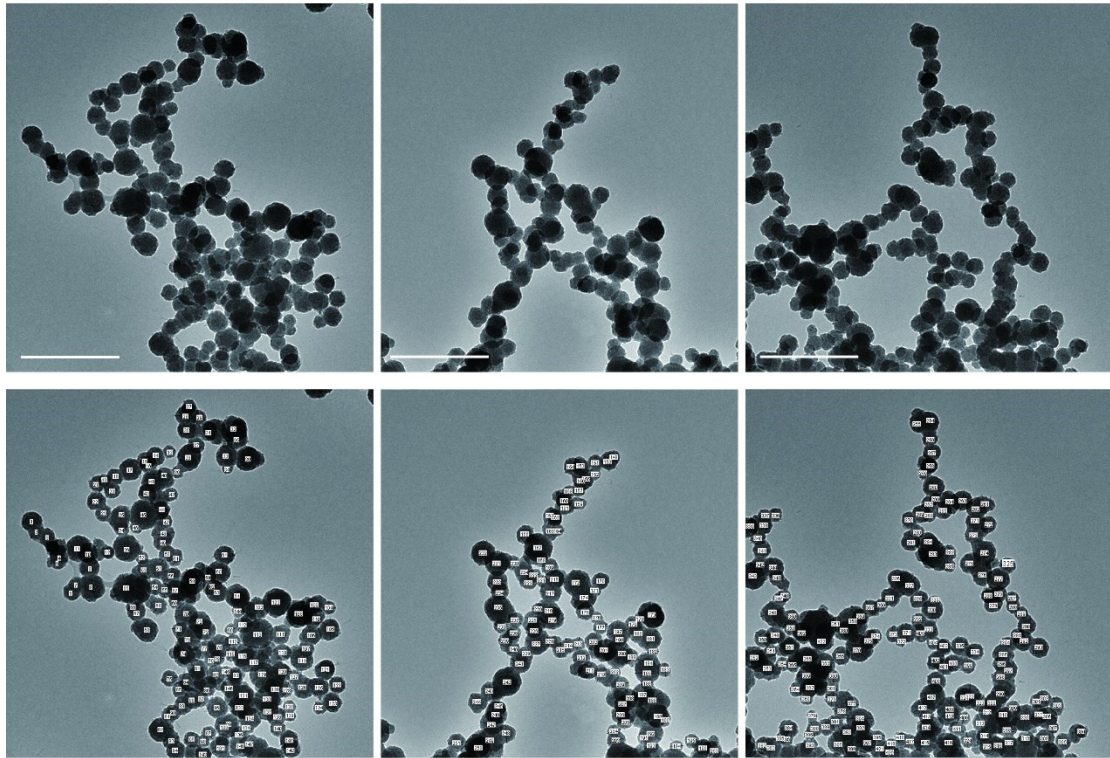

**Suppl Figure 6** The measure of primary particles for ACPs for C-tail group and the determination of diameters. (min: 48.72; max: 168.52; mean±SD: 87.98±21.39; N: 422)

---
